# Supplementary material
Source: publisher figshare collection journal article supplement (https://osapublishing.figshare.com/ndownloader/files/13884320)
Supplement: Supplementary file 1 [file 13884320]

wavelength	delta	beta
3.8	0.00382	0.0041502
3.9	0.00411	0.0042137
4	0.00379	0.004437
4.1	0.0037	0.0051382
4.2	0.00394	0.0041903
4.3	0.0037	0.0035826
4.4	0.00411	0.0050297
5	0.0045	0.0065381
6	0.0052	0.0060444
6.5	0.00622	0.0046502
12	0.03035	0.011125
12.5	0.03271	0.0092981
18	0.07089	0.027675
20	0.08775	0.036165
21	0.09827	0.041042
22	0.11062	0.047531
23	0.12407	0.055227
24	0.13902	0.06417
25	0.15693	0.078352
26	0.17388	0.095981
27	0.18906	0.1163
28	0.20295	0.13715
29	0.2169	0.15807
30	0.23284	0.18678
36	0.17921	0.54063
42	-0.0258	0.46453
48	-0.5171	0.32463
